# Supplementary material
Source: PubMed Central journal article supplement (PMC4260706)
Supplement: ismej201485x1.pdf [file ismej201485x1.pdf]

| ID                    | Annotation                                                                         | hd/hh logFC | dd/hd logFC | dd/hh logFC |
|-----------------------|------------------------------------------------------------------------------------|-------------|-------------|-------------|
| <b>Up-regulated</b>   |                                                                                    |             |             |             |
| CCHW5389              | Predicted protein                                                                  |             |             | 3.03        |
| CCHW6762              | Hemicentin-1                                                                       |             |             | 2.57        |
| CCHW7679              | PHD finger protein 21A                                                             |             |             | 2.29        |
| CCHW7202              | Predicted protein                                                                  |             |             | 2.23        |
| CCHW5584              | Hemicentin-1                                                                       |             |             | 2.21        |
| CCHW9787              | TNF receptor-associated factor 3                                                   |             |             | 2.18        |
| CCHW8275              | SMF2 domain/helicase domain/RING finger domain-containing protein                  |             |             | 2.18        |
| CAOQ916               | Uncharacterized transporter Mb0941                                                 |             |             | 2.15        |
| AOSF621               | DBH-like monoxygenase protein 2 homolog                                            |             |             | 2.13        |
| CCHW14171             | Methyltransferase-like protein 7A                                                  |             |             | 2.07        |
| CCHW7961              | Transcription factor ETV6                                                          |             |             | 2.00        |
| CCHW1799              | Cyclic AMP-responsive element-binding protein 1                                    | 1.59        |             | 1.99        |
| CCHW9445              | Keratinocyte growth factor                                                         |             |             | 1.87        |
| CCHW12686             | Mitochondrial uncoupling protein 3                                                 |             |             | 1.86        |
| CCHW9385              | Proteasome subunit alpha type-3                                                    | 1.58        |             | 1.86        |
| CCHW4254              | Metalloproteinase inhibitor 3                                                      |             |             | 1.83        |
| CCHW2303              | Predicted protein                                                                  |             |             | 1.68        |
| CCHW5714              | Centromere protein O                                                               |             |             | 1.63        |
| CCHW13119             | Diphosphoinositol polyphosphate phosphohydrolase 1                                 |             |             | 1.56        |
| CCHW5090              | Diphosphoinositol polyphosphate phosphohydrolase 2                                 |             |             | 1.50        |
| CCHW10041             | Orexin receptor type 2                                                             |             |             | 1.45        |
| CCHW5564              | Phosphatidate phosphatase PPAPDC1A                                                 |             |             | 1.41        |
| CCHW5833              | Sushi, von Willebrand factor type A, EGF and pentraxin domain-containing protein 1 |             |             | 1.37        |
| CCHW10116             | Balbiani ring protein 3                                                            |             |             | 1.34        |
| CCHW3371              | High affinity copper uptake protein 1                                              |             |             | 1.31        |
| AOSF921               | Predicted protein                                                                  |             |             | 1.29        |
| CCHW10618             | Cytosin                                                                            |             |             | 1.26        |
| CCHW10402             | Polyamine-modulated factor 1                                                       |             |             | 1.20        |
| CCHW14295             | Neuropeptide Y receptor                                                            |             |             | 1.13        |
| CCHW11845             | Sprouty                                                                            |             |             | 1.02        |
| CCHW5832              | Predicted protein                                                                  |             |             | 0.96        |
| <b>Down-regulated</b> |                                                                                    |             |             |             |
| CCHW9264              | U6 snRNA-associated Sm-like protein L5m7                                           |             |             | -0.78       |
| CCHW8173              | Delta(3,5)-Delta(2,4)-dienoyl-CoA isomerase, mitochondrial                         |             |             | -0.79       |
| AOSF946               | 60S ribosomal protein L35                                                          |             |             | -0.80       |
| CCHW14325             | Actin-related protein 2/3 complex subunit 4                                        |             |             | -0.80       |
| CCHW9016              | ADP-ribosylation factor-like protein 1b                                            |             |             | -0.81       |
| CCHW7705              | U4/U6.U5 tri-snRNP-associated protein 1                                            |             |             | -0.83       |
| CCHW6139              | U6 snRNA-associated Sm-like protein L5m3                                           |             |             | -0.86       |
| CCHW12962             | Small nuclear ribonucleoprotein E                                                  |             |             | -0.87       |
| CCHW5553              | Stress-induced-phosphoprotein 1                                                    |             |             | -0.90       |
| CCHW3930              | Lipoytransferase 1, mitochondrial                                                  |             |             | -0.93       |
| CCHW11592             | 4-hydroxyphenylpyruvate dioxygenase                                                |             |             | -0.93       |
| CCHW10437             | General transcription factor IIIH subunit 2                                        |             |             | -0.94       |
| CCHW2073              | Predicted protein                                                                  |             |             | -0.98       |
| CCHW7193              | Uncharacterized protein C2orf73 homolog                                            |             |             | -0.99       |
| CCHW14740             | Heat shock factor-binding protein 1                                                |             |             | -0.99       |
| CCHW10046             | Putative uncharacterized protein                                                   |             |             | -1.01       |
| CCHW2456              | DNA-directed RNA polymerase II subunit RPB4                                        |             |             | -1.03       |
| CCHW12185             | U6 snRNA-associated Sm-like protein L5m7                                           |             |             | -1.11       |
| CCHW11747             | NADH dehydrogenase [ubiquinone] iron-sulfur protein 6, mitochondrial               |             |             | -1.12       |
| CCHW4850              | Predicted protein                                                                  |             |             | -1.14       |
| CCHW11832             | Histamine H1 receptor                                                              |             |             | -1.15       |
| CCHW15969             | Predicted protein                                                                  |             |             | -1.18       |
| CCHW9690              | 60S ribosomal protein S8                                                           |             |             | -1.24       |
| CCHW16655             | Centrin-1                                                                          |             |             | -1.24       |
| CCHW15713             | Carnitine O-palmitoyltransferase 2, mitochondrial                                  |             |             | -1.26       |
| CCHW10336             | ATP synthase-coupling factor 6, mitochondrial                                      |             |             | -1.35       |
| CCHW1917              | Cytochrome b-c1 complex subunit 8                                                  |             |             | -1.48       |
| AOSF622               | Histone H2A.V (Fragment)                                                           |             |             | -1.84       |
| CCHW7234              | Uncharacterized protein C3orf26 homolog                                            |             |             | -1.95       |
| CCHW2534              | General transcriptional corepressor tupA                                           |             |             | -1.95       |
| CCHW7708              | Small cysteine-rich protein 1                                                      |             |             | -2.54       |
| CCHW6675              | Equitoxin-5                                                                        |             |             | -2.70       |
| CCHW5687              | -                                                                                  |             |             | 3.74        |
| CCHW14990             | -                                                                                  | 2.81        |             | 3.36        |
| CCHW4028              | -                                                                                  | 2.7         |             | 3.12        |
| CCHW3488              | -                                                                                  |             |             | 2.82        |
| CCHW7721              | -                                                                                  | 3.14        |             | 2.53        |
| CCHW15224             | -                                                                                  |             |             | 2.12        |
| CCHW11937             | -                                                                                  |             |             | 2.09        |
| CCHW3768              | -                                                                                  |             |             | 2.08        |
| CCHW2410              | -                                                                                  | 2.12        |             | 2.04        |
| CCHW4647              | -                                                                                  |             |             | 2.02        |
| CCHW12181             | -                                                                                  |             |             | 1.98        |
| CCHW12139             | -                                                                                  |             |             | 1.94        |
| CCHW8813              | -                                                                                  | 1.73        |             | 1.92        |
| CCHW14482             | -                                                                                  | 2.29        |             | 1.86        |
| CCHW10086             | -                                                                                  |             |             | 1.84        |
| CCHW794               | -                                                                                  |             |             | 1.83        |
| CCHW15352             | -                                                                                  | 1.64        |             | 1.83        |
| CCHW10486             | -                                                                                  |             |             | 1.79        |
| CCHW4094              | -                                                                                  |             |             | 1.74        |
| CCHW5516              | -                                                                                  |             |             | 1.73        |
| CCHW3210              | -                                                                                  |             |             | 1.72        |
| CCHW11965             | -                                                                                  |             |             | 1.71        |
| CCHW16514             | -                                                                                  |             |             | 1.70        |
| CCHW9825              | -                                                                                  |             |             | 1.65        |
| CCHW14910             | -                                                                                  | 1.51        |             | 1.65        |
| CCHW14225             | -                                                                                  |             |             | 1.64        |
| CCHW17595             | -                                                                                  |             |             | 1.61        |
| CCHW12198             | -                                                                                  |             |             | 1.61        |
| CCHW2085              | -                                                                                  |             |             | 1.61        |
| CCHW15857             | -                                                                                  |             |             | 1.57        |
| AOSF1329              | -                                                                                  | 1.94        |             | 1.50        |
| CCHW5683              | -                                                                                  |             |             | 1.49        |
| CCHW8965              | -                                                                                  |             |             | 1.49        |
| CCHW618               | -                                                                                  |             |             | 1.47        |
| CCHW8855              | -                                                                                  |             |             | 1.43        |
| CCHW7749              | -                                                                                  | 1.47        |             | 1.40        |
| CCHW11440             | -                                                                                  |             |             | 1.39        |
| CCHW16943             | -                                                                                  |             |             | 1.38        |
| CCHW4871              | -                                                                                  |             |             | 1.37        |
| CCHW15156             | -                                                                                  |             |             | 1.37        |
| CCHW2287              | -                                                                                  | 1.48        |             | 1.36        |
| CCHW14381             | -                                                                                  | 1.97        |             | 1.36        |
| CCHW1692              | -                                                                                  |             |             | 1.27        |
| CCHW7724              | -                                                                                  |             |             | 1.27        |
| CCHW2778              | -                                                                                  |             |             | 1.25        |
| CCHW14391             | -                                                                                  |             |             | 1.17        |
| CCHW15139             | -                                                                                  |             |             | 1.13        |
| CCHW5103              | -                                                                                  |             |             | 1.11        |
| AOSC1009              | -                                                                                  |             |             | 1.05        |
| CCHW5513              | -                                                                                  |             |             | 1.04        |
| CCHW5386              | -                                                                                  |             |             | 0.89        |
| CCHW4383              | -                                                                                  |             |             | 0.79        |
| CCHW3478              | -                                                                                  |             |             | -0.86       |
| CCHW6109              | -                                                                                  |             |             | -1.00       |
| CCHW16415             | -                                                                                  |             |             | -1.02       |
| CCHW507               | -                                                                                  |             |             | -1.05       |
| CCHW8033              | -                                                                                  |             |             | -1.08       |
| CCHW3895              | -                                                                                  |             |             | -1.13       |
| CCHW17430             | -                                                                                  |             |             | -1.17       |
| CCHW10425             | -                                                                                  |             |             | -1.24       |
| CCHW13201             | -                                                                                  |             |             | -1.28       |
| CCHW10717             | -                                                                                  |             |             | -1.28       |
| CCHW10465             | -                                                                                  |             |             | -1.32       |
| CCHW15440             | -                                                                                  |             |             | -1.33       |
| AOSF1152              | -                                                                                  |             |             | -1.56       |
| AOSF808               | -                                                                                  | -1.81       |             | -1.97       |
| CCHW15794             | -                                                                                  |             |             | -2.10       |
| CCHW15098             | -                                                                                  |             |             | -2.17       |
| CCHW1125              | -                                                                                  |             |             | -2.42       |
| CCHW12270             | -                                                                                  | 1.75        |             |             |
| CCHW6026              | -                                                                                  | -2.30       |             |             |
