# Supplementary material
Source: PubMed Central journal article supplement (PMC4260706)
Supplement: ismej201485x2.pdf [file ismej201485x2.pdf]

5.0 13.0

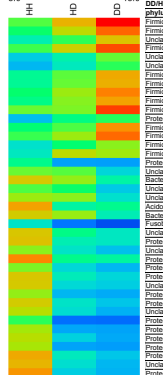

| phylum         | subphylum           | family                  | subfamily               | otu       | logFC | HH   | HD   | DD   |
|----------------|---------------------|-------------------------|-------------------------|-----------|-------|------|------|------|
| Firmicutes     | Clostridia          | Hydrothermabacteriaceae | Hydrothermabacteriaceae | HYD_4211  | 3.1   | 6.1  | 11.4 | 13.3 |
| Firmicutes     | Clostridia          | Peptostreptococcaceae   | Peptostreptococcaceae   | PCP_40409 | 2.4   | 9.7  | 10.9 | 12.1 |
| Unclassified   | Unclassified        | Unclassified            | Unclassified            | HYD_32009 | 2.3   | 8.0  | 8.9  | 11.2 |
| Unclassified   | Unclassified        | Peptostreptococcaceae   | Peptostreptococcaceae   | PCP_41903 | 2.3   | 8.0  | 11.0 | 12.2 |
| Unclassified   | Unclassified        | Unclassified            | Unclassified            | HYD_6120  | 2.3   | 8.0  | 8.9  | 10.2 |
| Unclassified   | Unclassified        | Unclassified            | Unclassified            | HYD_37205 | 2.3   | 7.8  | 8.7  | 9.9  |
| Firmicutes     | Clostridia          | Unclassified            | Unclassified            | HYD_40034 | 2.3   | 8.2  | 10.2 | 11.5 |
| Firmicutes     | Clostridia          | Unclassified            | Unclassified            | HYD_40704 | 2.2   | 8.2  | 9.2  | 11.4 |
| Firmicutes     | Clostridia          | Unclassified            | Unclassified            | PCP_38397 | 2.2   | 8.7  | 10.6 | 11.9 |
| Firmicutes     | Clostridia          | Peptostreptococcaceae   | Peptostreptococcaceae   | HYD_40524 | 2.2   | 8.4  | 10.9 | 11.6 |
| Firmicutes     | Clostridia          | Peptostreptococcaceae   | Peptostreptococcaceae   | HYD_42235 | 2.1   | 10.3 | 10.4 | 12.4 |
| Proteobacteria | Gammaproteobacteria | SP                      | Unclassified            | HYD_22462 | 2.1   | 7.1  | 8.4  | 9.6  |
| Firmicutes     | Clostridia          | Peptostreptococcaceae   | Peptostreptococcaceae   | HYD_41490 | 2.1   | 9.6  | 10.1 | 11.7 |
| Firmicutes     | Clostridia          | Unclassified            | Unclassified            | HYD_41772 | 2.1   | 10.0 | 10.6 | 12.0 |
| Firmicutes     | Clostridia          | Subdoligranulaceae      | Subdoligranulaceae      | HYD_32827 | 2.1   | 8.4  | 9.6  | 10.5 |
| Firmicutes     | Clostridia          | Ruminococcaceae         | Ruminococcaceae         | HYD_5282  | 2.0   | 8.6  | 10.5 | 10.7 |
| Unclassified   | Unclassified        | Unclassified            | Unclassified            | HYD_19170 | 2.1   | 9.3  | 7.9  | 7.2  |
| Unclassified   | Unclassified        | Unclassified            | Unclassified            | HYD_23055 | 2.1   | 10.3 | 10.2 | 8.2  |
| Bacteroidetes  | S24K1181            | SP                      | Unclassified            | HYD_47468 | 2.1   | 11.1 | 10.6 | 9.9  |
| Unclassified   | Unclassified        | Unclassified            | Unclassified            | HYD_11463 | 2.0   | 10.1 | 9.7  | 7.9  |
| Unclassified   | Unclassified        | Unclassified            | Unclassified            | HYD_47468 | 2.0   | 10.6 | 10.4 | 8.4  |
| Actinobacteria | B1-15               | SP                      | Unclassified            | HYD_56021 | 2.0   | 11.5 | 10.5 | 9.3  |
| Bacteroidetes  | F1-LAY              | SP                      | Unclassified            | HYD_12403 | 2.0   | 11.1 | 10.6 | 8.8  |
| Proteobacteria | Gammaeubacteriales  | SP                      | Unclassified            | HYD_41493 | 2.0   | 8.5  | 7.4  | 7.2  |
| Unclassified   | Unclassified        | Unclassified            | Unclassified            | HYD_20051 | 2.0   | 11.2 | 9.4  | 8.1  |
| Proteobacteria | Gammaproteobacteria | SP                      | Unclassified            | HYD_19170 | 2.0   | 11.2 | 10.8 | 9.6  |
| Unclassified   | Unclassified        | Unclassified            | Unclassified            | HYD_20397 | 2.0   | 10.5 | 8.5  | 7.8  |
| Proteobacteria | Gammaproteobacteria | SP                      | Unclassified            | HYD_19605 | 2.0   | 11.9 | 9.3  | 9.1  |
| Proteobacteria | Gammaproteobacteria | SP                      | Unclassified            | HYD_19423 | 2.0   | 10.4 | 8.2  | 7.5  |
| Proteobacteria | Gammaproteobacteria | SP                      | Enterobacteriales       | HYD_18584 | 2.0   | 11.2 | 8.7  | 8.2  |
| Unclassified   | Unclassified        | Unclassified            | Unclassified            | HYD_20229 | 2.1   | 11.1 | 8.2  | 8.0  |
| Proteobacteria | Gammaproteobacteria | SP                      | Unclassified            | HYD_20337 | 2.0   | 10.6 | 7.6  | 7.6  |
| Proteobacteria | Gammaproteobacteria | SP                      | Unclassified            | HYD_20465 | 2.0   | 11.1 | 8.5  | 8.0  |
| Unclassified   | Unclassified        | Unclassified            | Unclassified            | HYD_20202 | 2.0   | 10.9 | 8.4  | 7.5  |
| Proteobacteria | Gammaproteobacteria | SP                      | Unclassified            | HYD_20465 | 2.0   | 9.9  | 8.0  | 8.0  |
| Proteobacteria | Gammaproteobacteria | SP                      | Unclassified            | HYD_18852 | 2.0   | 10.7 | 7.4  | 7.3  |
| Proteobacteria | Gammaproteobacteria | SP                      | Unclassified            | HYD_18852 | 2.0   | 10.6 | 8.1  | 7.4  |
| Proteobacteria | Gammaproteobacteria | SP                      | Unclassified            | HYD_20277 | 2.0   | 10.7 | 7.3  | 7.2  |
| Proteobacteria | Gammaproteobacteria | SP                      | Unclassified            | HYD_20704 | 2.0   | 11.5 | 10.0 | 8.2  |
| Unclassified   | Unclassified        | Unclassified            | Unclassified            | HYD_19911 | 2.0   | 11.4 | 8.4  | 7.8  |
| Proteobacteria | Gammaproteobacteria | SP                      | Unclassified            | HYD_24380 | 2.0   | 11.7 | 8.5  | 7.6  |

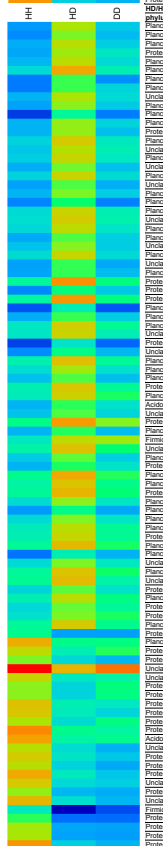

| phylum         | subphylum           | family          | subfamily          | otu       | logFC | HH   | HD   | DD   |
|----------------|---------------------|-----------------|--------------------|-----------|-------|------|------|------|
| Planctomycetes | Planctomycetia      | SP              | Planctomycetia     | HYD_5321  | 3.1   | 7.2  | 10.3 | 7.9  |
| Planctomycetes | Planctomycetia      | SP              | Planctomycetia     | HYD_54138 | 3.0   | 7.0  | 10.4 | 7.7  |
| Planctomycetes | Planctomycetia      | SP              | Planctomycetia     | HYD_50365 | 3.0   | 7.2  | 10.6 | 8.0  |
| Proteobacteria | Alphaproteobacteria | SP              | Unclassified       | HYD_17692 | 3.3   | 7.4  | 10.7 | 8.6  |
| Planctomycetes | Planctomycetia      | SP              | Planctomycetia     | HYD_53870 | 3.0   | 7.8  | 10.3 | 8.1  |
| Planctomycetes | Planctomycetia      | SP              | Unclassified       | HYD_53851 | 3.2   | 8.3  | 11.5 | 8.3  |
| Planctomycetes | Planctomycetia      | SP              | Unclassified       | HYD_53477 | 3.0   | 8.7  | 10.5 | 7.9  |
| Planctomycetes | Planctomycetia      | SP              | Unclassified       | HYD_53244 | 3.2   | 8.7  | 10.3 | 8.1  |
| Unclassified   | Unclassified        | Unclassified    | Unclassified       | HYD_53869 | 3.2   | 7.8  | 10.7 | 8.0  |
| Planctomycetes | Planctomycetia      | SP              | Unclassified       | HYD_54014 | 3.2   | 7.9  | 10.5 | 8.0  |
| Planctomycetes | Planctomycetia      | SP              | Planctomycetia     | HYD_53980 | 3.2   | 8.0  | 8.1  | 8.8  |
| Planctomycetes | Planctomycetia      | SP              | Planctomycetia     | HYD_54014 | 3.2   | 7.6  | 10.6 | 8.1  |
| Proteobacteria | Alphaproteobacteria | SP              | Unclassified       | HYD_18046 | 3.0   | 7.6  | 10.6 | 7.7  |
| Planctomycetes | Planctomycetia      | SP              | Unclassified       | HYD_54445 | 3.0   | 8.1  | 11.1 | 8.6  |
| Unclassified   | Unclassified        | Unclassified    | Unclassified       | HYD_54131 | 2.9   | 7.9  | 10.8 | 8.3  |
| Planctomycetes | Planctomycetia      | SP              | BC12-25            | HYD_51927 | 3.0   | 8.1  | 11.0 | 8.1  |
| Unclassified   | Unclassified        | Unclassified    | Unclassified       | HYD_17360 | 2.6   | 7.5  | 10.4 | 7.8  |
| Planctomycetes | Planctomycetia      | SP              | BC12-25            | HYD_53778 | 2.8   | 8.1  | 11.0 | 8.3  |
| Unclassified   | Unclassified        | Unclassified    | Unclassified       | HYD_53777 | 2.8   | 7.3  | 10.1 | 7.5  |
| Planctomycetes | Planctomycetia      | SP              | Unclassified       | HYD_54222 | 2.8   | 7.6  | 10.4 | 8.0  |
| Planctomycetes | Planctomycetia      | SP              | Planctomycetia     | HYD_53978 | 2.8   | 8.0  | 11.0 | 8.1  |
| Planctomycetes | Planctomycetia      | SP              | Unclassified       | HYD_53620 | 2.7   | 8.3  | 11.0 | 8.3  |
| Unclassified   | Unclassified        | Unclassified    | Unclassified       | HYD_53967 | 2.7   | 8.4  | 11.1 | 8.0  |
| Planctomycetes | Planctomycetia      | SP              | Unclassified       | HYD_53391 | 2.7   | 8.2  | 10.9 | 8.5  |
| Planctomycetes | Planctomycetia      | SP              | Unclassified       | HYD_53390 | 2.7   | 7.4  | 10.8 | 8.0  |
| Unclassified   | Unclassified        | Unclassified    | Unclassified       | HYD_53957 | 2.7   | 7.8  | 10.5 | 8.0  |
| Planctomycetes | Planctomycetia      | SP              | BC12-25            | HYD_54009 | 2.7   | 8.2  | 10.3 | 8.3  |
| Unclassified   | Unclassified        | Unclassified    | Unclassified       | HYD_53844 | 2.7   | 7.3  | 9.3  | 7.4  |
| Planctomycetes | Planctomycetia      | SP              | Unclassified       | HYD_53784 | 2.6   | 7.8  | 10.9 | 7.7  |
| Proteobacteria | Alphaproteobacteria | SP              | Unclassified       | HYD_16981 | 2.6   | 8.1  | 11.1 | 9.5  |
| Proteobacteria | Alphaproteobacteria | SP              | Rhodospiraceae     | HYD_18123 | 2.6   | 8.9  | 9.5  | 7.6  |
| Planctomycetes | Planctomycetia      | SP              | Unclassified       | HYD_54044 | 2.6   | 8.2  | 10.6 | 8.0  |
| Planctomycetes | Planctomycetia      | SP              | Unclassified       | HYD_53451 | 2.6   | 8.2  | 8.8  | 8.3  |
| Planctomycetes | Planctomycetia      | SP              | Unclassified       | HYD_53444 | 2.6   | 7.4  | 10.3 | 8.0  |
| Planctomycetes | Planctomycetia      | SP              | Planctomycetia     | HYD_54002 | 2.6   | 8.6  | 11.1 | 9.2  |
| Unclassified   | Unclassified        | Unclassified    | Unclassified       | HYD_17692 | 2.6   | 8.5  | 11.0 | 8.2  |
| Proteobacteria | Alphaproteobacteria | SP              | Unclassified       | HYD_14748 | 2.4   | 6.0  | 8.5  | 8.3  |
| Unclassified   | Unclassified        | Unclassified    | Unclassified       | HYD_17692 | 2.4   | 7.5  | 8.4  | 7.5  |
| Planctomycetes | Planctomycetia      | SP              | Unclassified       | HYD_53842 | 2.4   | 8.9  | 11.3 | 10.2 |
| Planctomycetes | Planctomycetia      | SP              | Planctomycetia     | HYD_53460 | 2.3   | 8.3  | 10.7 | 8.4  |
| Planctomycetes | Planctomycetia      | SP              | Planctomycetia     | HYD_53460 | 2.3   | 8.3  | 11.0 | 8.4  |
| Proteobacteria | Alphaproteobacteria | SP              | Unclassified       | HYD_15080 | 2.3   | 8.9  | 11.2 | 9.2  |
| Planctomycetes | Planctomycetia      | SP              | Unclassified       | HYD_53241 | 2.3   | 8.7  | 11.3 | 9.2  |
| Actinobacteria | B1-15               | SP              | Unclassified       | HYD_55876 | 2.3   | 7.8  | 10.9 | 8.4  |
| Unclassified   | Unclassified        | Unclassified    | Unclassified       | HYD_17203 | 2.3   | 7.8  | 10.1 | 8.2  |
| Proteobacteria | Alphaproteobacteria | SP              | Unclassified       | HYD_18753 | 2.3   | 9.3  | 11.6 | 10.4 |
| Planctomycetes | Planctomycetia      | SP              | Unclassified       | HYD_54148 | 2.3   | 7.8  | 10.3 | 7.7  |
| Firmicutes     | Clostridia          | Ruminococcaceae | Ruminococcaceae    | HYD_5282  | 2.3   | 8.6  | 10.9 | 10.7 |
| Unclassified   | Unclassified        | Unclassified    | Unclassified       | HYD_53974 | 2.3   | 8.8  | 11.2 | 9.6  |
| Planctomycetes | Planctomycetia      | SP              | Unclassified       | HYD_53960 | 2.3   | 8.0  | 10.2 | 9.6  |
| Proteobacteria | Alphaproteobacteria | SP              | Unclassified       | HYD_14910 | 2.2   | 7.6  | 9.8  | 8.5  |
| Planctomycetes | Planctomycetia      | SP              | Unclassified       | HYD_53971 | 2.2   | 8.2  | 11.2 | 9.3  |
| Planctomycetes | Planctomycetia      | SP              | Planctomycetia     | HYD_53602 | 2.2   | 8.0  | 11.2 | 9.3  |
| Proteobacteria | Alphaproteobacteria | SP              | Phyllobacteriaceae | HYD_19170 | 2.2   | 8.2  | 11.4 | 9.6  |
| Planctomycetes | Planctomycetia      | SP              | Unclassified       | HYD_54198 | 2.2   | 8.3  | 10.5 | 8.3  |
| Planctomycetes | Planctomycetia      | SP              | Unclassified       | HYD_53660 | 2.2   | 8.7  | 9.9  | 7.4  |
| Planctomycetes | Planctomycetia      | SP              | Unclassified       | HYD_53949 | 2.2   | 8.3  | 10.4 | 8.5  |
| Planctomycetes | Planctomycetia      | SP              | Planctomycetia     | HYD_54148 | 2.2   | 8.7  | 10.3 | 9.5  |
| Proteobacteria | Alphaproteobacteria | SP              | Phyllobacteriaceae | HYD_19609 | 2.1   | 8.9  | 11.0 | 10.2 |
| Planctomycetes | Planctomycetia      | SP              | Unclassified       | HYD_53771 | 2.1   | 8.2  | 11.3 | 9.7  |
| Planctomycetes | Planctomycetia      | SP              | Planctomycetia     | HYD_54044 | 2.1   | 8.2  | 11.0 | 9.4  |
| Unclassified   | Unclassified        | Unclassified    | Unclassified       | HYD_53380 | 2.1   | 8.3  | 10.4 | 8.9  |
| Planctomycetes | Planctomycetia      | SP              | Unclassified       | HYD_54100 | 2.1   | 8.1  | 11.2 | 9.7  |
| Unclassified   | Unclassified        | Unclassified    | Unclassified       | HYD_53890 | 2.1   | 8.2  | 11.3 | 10.0 |
| Proteobacteria | Alphaproteobacteria | SP              | Unclassified       | HYD_17448 | 2.1   | 8.1  | 10.2 | 9.5  |
| Planctomycetes | Planctomycetia      | SP              | Unclassified       | HYD_53620 | 2.1   | 8.8  | 10.9 | 9.4  |
| Proteobacteria | Alphaproteobacteria | SP              | Phyllobacteriaceae | HYD_17180 | 2.1   | 8.2  | 10.2 | 9.2  |
| Proteobacteria | Alphaproteobacteria | SP              | Phyllobacteriaceae | HYD_15670 | 2.0   | 8.4  | 10.4 | 9.8  |
| Planctomycetes | Planctomycetia      | SP              | Unclassified       | HYD_54198 | 2.0   | 8.1  | 11.1 | 9.5  |
| Proteobacteria | Gammaproteobacteria | SP              | Unclassified       | HYD_18913 | 2.0   | 9.3  | 11.3 | 10.4 |
| Planctomycetes | Planctomycetia      | SP              | Unclassified       | HYD_20480 | 2.0   | 11.4 | 9.5  | 9.4  |
| Proteobacteria | Alphaproteobacteria | SP              | Unclassified       | HYD_20480 | 2.0   | 10.9 | 10.8 | 9.9  |
| Proteobacteria | Gammaproteobacteria | SP              | Unclassified       | HYD_19423 | 2.0   | 10.4 | 8.1  | 7.6  |
| Unclassified   | Unclassified        | Unclassified    | Unclassified       | HYD_97106 | 2.0   | 11.6 | 11.3 | 10.0 |
| Unclassified   | Unclassified        | Unclassified    | Unclassified       | HYD_20354 | 2.0   | 11.0 | 8.6  | 9.0  |
| Proteobacteria | Gammaproteobacteria | SP              | Unclassified       | HYD_20462 | 2.0   | 10.8 | 8.2  | 8.2  |
| Proteobacteria | Gammaproteobacteria | SP              | Unclassified       | HYD_18853 | 2.0   | 10.5 | 8.1  | 7.4  |
| Proteobacteria | Gammaproteobacteria | SP              | Unclassified       | HYD_20719 | 2.0   | 11.2 | 8.8  | 8.2  |
| Proteobacteria | Gammaproteobacteria | SP              | Enterobacteriales  | HYD_18584 | 2.0   | 11.2 | 8.7  | 8.2  |
| Proteobacteria | Gammaproteobacteria | SP              | Unclassified       | HYD_18603 | 2.0   | 10.8 | 8.1  | 8.4  |
| Proteobacteria | Gammaproteobacteria | SP              | Unclassified       | HYD_17660 | 2.0   | 11.3 | 9.3  | 8.4  |
| Actinobacteria | B1-15               | SP              | Unclassified       | HYD_56021 | 2.0   | 11.5 | 10.5 | 9.3  |
| Unclassified   | Unclassified        | Unclassified    | Unclassified       | HYD_20205 | 2.0   | 10.8 | 7.9  | 7.6  |
| Proteobacteria | Gammaproteobacteria | SP              | Unclassified       | HYD_20490 | 2.0   | 11.1 | 8.5  | 7.9  |
| Proteobacteria | Gammaproteobacteria | SP              | Unclassified       | HYD_19603 | 2.0   | 10.8 | 8.1  | 7.4  |
| Proteobacteria | Gammaproteobacteria | SP              | Unclassified       | HYD_20354 | 2.0   | 11.5 | 8.7  | 7.9  |
| Unclassified   | Unclassified        | Unclassified    | Unclassified       | HYD_20229 | 2.0   | 11.1 | 8.2  | 8.0  |
| Proteobacteria | Gammaproteobacteria | SP              | Unclassified       | HYD_20337 | 2.0   | 10.6 | 7.8  | 7.4  |
| Unclassified   | Unclassified        | Unclassified    | Unclassified       | HYD_18901 | 2.0   | 11.4 | 8.4  | 7.6  |
| Firmicutes     | Clostridia          | Planctomycetia  | Planctomycetia     | HYD_4892  | 2.0   | 8.6  | 8.4  | 7.9  |
| Proteobacteria | Gammaproteobacteria | SP              | Unclassified       | HYD_20340 | 2.0   | 9.9  | 8.6  | 8.5  |
| Proteobacteria | Gammaproteobacteria | SP              | Unclassified       | HYD_18962 | 2.0   | 10.7 | 10.4 | 7.9  |
| Proteobacteria | Gammaproteobacteria | SP              | Unclassified       | HYD_20277 | 2.0   | 10.7 | 7.3  | 7.2  |
| Proteobacteria | Gammaproteobacteria | SP              | Unclassified       | HYD_24380 | 2.0   | 11.7 | 8.5  | 7.6  |

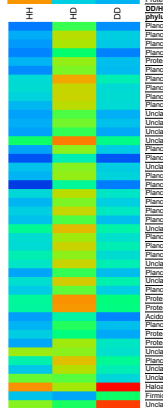

| phylum         | subphylum      | family | subfamily      | otu       | logFC | HH  | HD   | DD  |
|----------------|----------------|--------|----------------|-----------|-------|-----|------|-----|
| Planctomycetes | Planctomycetia | SP     | Unclassified   | HYD_53477 | -2.8  | 8.7 | 10.0 | 7.0 |
| Planctomycetes | Planctomycetia | SP     | Planctomycetia | HYD_53966 | -2.8  | 7.8 | 10.9 | 8.0 |
| Planctomycetes |                |        |                |           |       |     |      |     |
